# Supplementary material for: An integrative approach to understanding diversity patterns and assemblage rules in Neotropical bats
Source: Sci Rep. 2023 Jun 1;13:8891. doi: 10.1038/s41598-023-35100-z (PMC10235113; doi:10.1038/s41598-023-35100-z)
Supplement: Supplementary file 1 — Supplementary Information 1. [file 41598_2023_35100_MOESM1_ESM.xlsx]

## Sheet: Abundancias
Appendix: rows are sites and colums are species
comm	Anoura_aecuatoris	Anoura_carishina	Anoura_caudifer	Anoura_cultrata	Anoura_geoffroyi	Anoura_latidens	Anoura_luismanueli	Artibeus_aecuatorialis	Artibeus_amplus	Artibeus_fimbriatus	Artibeus_fraterculus	Artibeus_jamaicensis	Artibeus_lituratus	Artibeus_planirostris	Artibeus_sp1	Carollia_brevicauda	Carollia_castanea	Carollia_perspicillata	Chiroderma_salvini	Chiroderma_trinitatum	Chiroderma_villosum	Choeroniscus_godmani	Choeroniscus_minor	Choeroniscus_periosus	Cynomops_abrasus	Dermanura_anderseni	Dermanura_bogotensis	Dermanura_phaeotis	Dermanura_rava	Dermanura_rosenbergi	Desmodus_rotundus	Enchisthenes_hartii	Eptesicus_andinus	Eptesicus_brasiliensis	Eptesicus_chiriquinus	Eumops_glaucinus	Gardnerycteris_crenulatum	Glossophaga_soricina	Histiotus_humboldti	Histiotus_montanus	Hsunycteris_cadenai	Hsunycteris_pattoni	Hsunycteris_thomasi	Lichonycteris_obscura	Lonchophylla_chocoana	Lonchophylla_concava	Lonchophylla_fornitaca	Lonchophylla_robusta	Lonchophylla_thomasi
Cofre	0	0	0	0	0	0	0	0	0	0	0	0	11	0	0	13	0	14	0	0	0	0	0	0	0	0	0	0	1	0	0	0	0	0	1	0	0	0	0	0	0	0	0	0	0	0	0	0	0
Umbria	0	0	0	0	1	0	0	0	0	0	0	0	15	0	0	2	1	1	3	0	0	1	0	0	0	0	1	3	0	0	0	1	0	1	0	0	0	3	0	0	0	0	0	0	0	0	0	0	0
Baudo	0	0	0	0	0	0	0	1	0	1	0	0	1	0	0	0	4	2	0	0	0	0	0	0	0	0	1	0	2	24	0	0	0	0	0	0	0	0	0	0	0	0	1	0	0	0	0	0	0
Guarinocito	0	0	0	0	0	0	0	0	0	0	0	0	3	0	3	2	4	12	0	0	0	0	0	0	0	16	0	0	0	0	2	0	0	0	0	0	0	1	0	0	0	0	0	0	0	0	0	0	0
Vinculo	0	0	0	0	0	0	0	3	0	0	0	0	7	1	1	1	1	6	2	0	0	1	0	0	2	0	0	2	0	0	1	2	0	0	0	1	3	5	0	0	0	0	0	0	0	0	0	0	0
Laguna	0	0	0	0	7	0	0	0	0	0	0	0	0	0	0	0	0	0	0	0	0	0	0	0	0	0	0	0	0	0	0	0	0	0	0	0	0	0	0	1	0	0	0	0	0	0	0	0	0
Ucumari	5	0	1	0	0	0	0	0	0	0	0	0	6	0	0	0	0	1	1	0	0	0	0	0	0	0	0	6	3	1	1	0	0	0	0	0	0	0	0	0	0	0	0	0	0	0	0	0	0
Ensenada	0	0	0	0	0	0	0	3	0	1	0	0	3	0	0	2	1	5	1	0	2	0	0	0	0	0	0	1	4	0	0	0	0	0	0	0	0	15	0	0	0	0	0	0	0	0	0	1	0
Patasola	4	0	1	0	0	1	0	0	0	0	0	0	0	0	0	5	0	0	0	0	0	0	0	0	0	0	1	0	1	0	1	0	0	0	0	0	0	0	0	0	0	0	0	0	0	0	0	0	0
Salento	0	0	0	0	2	0	0	0	0	0	0	0	0	0	0	0	0	0	0	0	0	0	0	0	0	0	0	0	0	0	0	0	2	0	0	0	0	0	0	0	0	0	0	0	0	0	0	0	0
Bitaco	0	0	1	0	1	0	0	0	0	0	0	0	1	0	0	7	0	0	0	0	0	0	0	0	0	0	1	3	2	0	0	0	0	0	0	0	0	0	0	1	0	0	0	0	0	0	0	0	0
Cerro	4	1	2	0	3	0	0	0	0	0	0	0	0	0	0	1	0	0	0	0	0	0	0	0	0	0	1	7	22	0	0	0	0	0	1	0	0	0	1	0	0	0	0	0	1	0	0	0	0
Quebrada	0	0	1	0	0	0	0	0	0	0	0	0	0	0	0	4	0	0	0	0	0	0	0	0	0	0	0	0	4	0	0	0	0	0	0	0	0	0	0	0	0	0	0	0	0	0	0	0	0
Calima	0	0	0	0	0	0	0	28	0	5	1	0	54	1	1	10	41	46	0	0	0	0	3	10	0	0	20	0	12	104	5	3	0	0	1	0	5	2	0	0	1	2	6	9	0	1	0	0	1
Malaga	0	0	0	0	0	0	0	37	1	7	0	1	10	5	0	4	3	14	0	2	0	0	0	2	0	0	2	0	7	58	0	0	0	0	0	0	0	17	0	0	1	0	1	4	0	0	0	1	0
Oso	1	0	5	2	0	0	4	1	0	0	0	0	0	0	0	9	4	13	2	0	0	0	1	0	0	0	0	0	1	18	2	9	0	0	0	0	0	0	0	0	0	0	0	0	0	0	0	3	0
Galapagos	3	3	4	0	0	2	1	0	0	0	0	0	7	0	0	8	1	0	0	0	0	0	0	0	0	0	2	5	23	0	0	6	0	0	0	0	0	0	0	0	0	0	0	0	1	0	0	1	0
Anchicaya	0	0	2	0	0	0	0	0	0	0	0	0	1	0	0	8	7	4	1	0	0	0	0	0	0	0	0	0	3	1	1	0	0	0	0	0	0	0	0	0	0	0	0	0	0	2	3	5	0
Palmar	0	0	2	0	1	0	0	0	0	1	1	0	2	0	0	8	6	17	1	0	0	0	0	0	0	0	0	2	23	1	0	1	0	0	0	0	0	0	0	0	0	0	0	2	1	1	0	0	0
Amurrapa	0	0	0	0	0	0	0	2	0	0	0	0	7	0	1	10	0	17	0	0	0	0	0	0	0	0	2	5	7	1	1	0	0	0	0	0	0	0	0	0	0	0	0	0	0	0	0	0	0
[truncated: 48 more columns]
