# Supplementary material for: An integrative approach to understanding diversity patterns and assemblage rules in Neotropical bats
Source: Sci Rep. 2023 Jun 1;13:8891. doi: 10.1038/s41598-023-35100-z (PMC10235113; doi:10.1038/s41598-023-35100-z)
Supplement: Supplementary file 2 — Supplementary Information 2. [file 41598_2023_35100_MOESM2_ESM.xlsx]

## Sheet: Promedios-1 copy
Appendix: Column A: species name; Column B: length of forearm; Column C: mass; Column D: total length; Column E: wing shape (ratio of the length of the third digit metacarpal to the length of the fifth digit metacarpal); Column F: relative length of the pinna (ratio of the ear length to the length of de forearm); Column G: total skull length; Column H: breadth of braincase; Column I: length of ma…
sp	F	M	TL	Wing	Pinna	STL	BB	MTRL	BUM	AxL	MSW	JTL	CCL	CPH	FG
Anoura_aecuatoris	35.5162	9.90952	58.2157	1.60237	0.353794	22.2533	8.93429	7.99429	5.49619	1.19901	6.78	15.4633	14.4271	3.84524	Nectarivore
Anoura_carishina	42.4025	15.125	65.2875	1.59684	0.401775	24.8888	9.61375	9.43625	5.925	1.48703	7.35187	17.235	16.0925	4.665	Nectarivore
Anoura_caudifer	35.2522	9.78649	55.7838	1.62221	0.389548	22.0068	8.83054	7.64676	5.48649	1.23048	6.62811	15.4576	14.36	3.89	Nectarivore
Anoura_cultrata	40.805	18.875	76.1	1.75266	0.430517	25.36	10.125	8.72	6.49	1.59695	7.6175	18.315	17.85	4.955	Nectarivore
Anoura_geoffroyi	43.1326	16.1296	64.2207	1.66748	0.383665	25.2519	9.75222	9.32407	6.09593	1.53085	7.31722	17.6733	16.4978	4.55148	Nectarivore
Anoura_latidens	42.0725	16.575	64.6625	1.57616	0.378356	24.5275	9.7875	9.38	6.0825	1.59555	7.37	17.375	16.365	4.55	Nectarivore
Anoura_luismanueli	33.1962	9.4625	57.35	1.65623	0.395555	21.5837	8.8275	7.84	5.43375	1.18154	6.5875	14.8775	13.8362	3.6625	Nectarivore
Artibeus_aecuatorialis	61.768	43.0197	85.8082	1.4534	0.34308	28.9598	12.867	10.6177	13.2628	7.5153	10.6905	19.0467	18.9313	8.1023	Nomadic frugivore
Artibeus_amplus	70.55	58.1	98.05	1.45709	0.410418	31.23	13.4	11.32	13.8	8.4825	10.79	20.4	20.4	9.39	Nomadic frugivore
Artibeus_fimbriatus	62.3017	44.2333	89.1208	1.44467	0.373369	29.2138	12.7479	10.6383	13.3746	7.11542	10.7829	19.0938	19.0975	8.07875	Nomadic frugivore
Artibeus_fraterculus	64.34	44.1	86.8	1.47316	0.405637	29.385	12.28	10.85	13.39	7.4831	10.8075	19.625	19.325	8.42	Nomadic frugivore
Artibeus_jamaicensis	58.54	36.1	90.05	1.20134	0.453604	28.23	12.45	10.78	13.03	8.2249	10.665	19.28	19.09	8	Nomadic frugivore
Artibeus_lituratus	68.9069	62.8805	91.9947	1.47051	0.325258	30.2642	12.3481	11.0981	13.7209	8.49224	10.9764	20.245	16.9599	9.72504	Nomadic frugivore
Artibeus_planirostris	63.6208	47.4615	84.8769	1.42888	0.403742	29.9308	13.1538	10.7715	13.6685	8.04708	10.825	19.4954	19.4438	8.39462	Nomadic frugivore
Artibeus_sp1	60.6844	42.8813	80.5125	1.46725	0.407251	28.6075	12.7031	10.7475	13.4863	7.76815	10.6022	18.8762	18.7406	8.12187	Nomadic frugivore
Carollia_brevicauda	40.3705	16.2805	68.2199	1.42567	0.42708	22.0057	9.57373	7.11545	7.97745	2.09713	7.74132	13.9299	13.6318	5.16818	Sedentary frugivore
Carollia_castanea	36.4923	11.4919	61.5304	1.42562	0.440548	19.9421	8.979	6.45929	7.36429	1.63271	7.35619	12.601	12.1053	4.46571	Sedentary frugivore
Carollia_perspicillata	42.2914	17.7842	70.6455	1.42142	0.420647	22.6057	9.74993	7.59525	8.24417	2.35337	7.89544	14.4764	14.3339	5.39734	Sedentary frugivore
Chiroderma_salvini	50.0911	31.4821	78.9071	1.52671	0.448554	26.4793	11.5071	9.64429	12.1054	7.96783	9.42679	17.6489	17.4264	6.50571	Nomadic frugivore
Chiroderma_trinitatum	39.235	14.125	64.1	1.50677	0.511368	21.69	9.43	7.275	9.73	4.6108	7.8875	13.365	13.18	5.125	Nomadic frugivore
Chiroderma_villosum	43.585	18.025	68.025	1.44998	0.408363	23.77	10.365	8.555	11.04	5.8456	8.3275	15.085	14.95	5.975	Nomadic frugivore
Choeroniscus_godmani	31.34	6.35	55.55	1.52771	0.351191	19.07	7.83	6.945	4.065	0.52215	5.4125	13.005	12.365	2.46	Nectarivore
Choeroniscus_minor	38.105	10.4625	76.7875	1.59692	0.390557	27.8038	9.29625	9.7925	5.0475	0.68165	7.00375	20.3538	19.1462	3.66625	Nectarivore
Choeroniscus_periosus	39.0164	12.0071	81.0429	1.53346	0.338788	29.6636	9.16714	10.5043	5.025	0.79475	7.01143	21.4371	18.6157	6.95714	Nectarivore
Cynomops_abrasus	42.75	24.525	113.525	1.85062	0.409975	19.915	10.41	7.865	9.915	4.7551	8.21	14.235	14.195	5.095	Aerial insectivore
Dermanura_anderseni	36.1838	9.84	45.63	1.4578	0.398376	18.185	8.61	5.74125	7.92125	2.15609	8.37469	10.6319	10.7662	4.3775	Nomadic frugivore
Dermanura_bogotensis	38.7077	12.0231	52.8231	1.46207	0.424742	19.7546	8.93615	6.54327	8.30615	2.34107	7.29308	12.1509	12.2083	4.64935	Nomadic frugivore
Dermanura_phaeotis	39.6147	12.8647	53.3616	1.43546	0.39232	19.8765	9.11302	6.68628	8.67488	2.97906	7.52849	12.236	12.3144	6.13186	Nomadic frugivore
Dermanura_rava	39.9557	13.5269	56.4708	1.44675	0.378174	20.0735	9.17869	6.71585	8.75908	2.94158	7.48012	12.3358	12.4407	5.02123	Nomadic frugivore
Dermanura_rosenbergi	37.4866	10.7385	52.4349	1.46676	0.403106	19.4339	8.76697	6.33633	8.11881	2.24312	7.10752	12.1151	12.0815	4.48404	Nomadic frugivore
Desmodus_rotundus	57.7491	31.8152	75.4176	1.21086	0.356357	23.4909	11.9173	3.91061	6.53545	8.41e-19	8.74136	14.2994	12.1409	5.71455	Sanguivore
Enchisthenes_hartii	39.066	15.4314	59.8657	1.49572	0.405371	20.4934	9.52571	6.878	8.63571	3.14172	7.92929	12.4326	12.4923	4.84914	Nomadic frugivore
Eptesicus_andinus	44.1	9.025	114.025	1.27621	0.351436	16.135	8.135	6.01	7.095	2.31655	6.2675	11.545	10.66	4.015	Aerial insectivore
Eptesicus_brasiliensis	42.02	10.1	104.05	1.4632	0.41009	16.17	7.6	6.11	6.89	2.1004	6.235	11.71	10.62	4.78	Aerial insectivore
Eptesicus_chiriquinus	46.5967	11.7667	106.717	1.44806	0.436726	16.71	8.06	6.77333	7.3	3.16037	6.36	12.8167	11.6367	4.56333	Aerial insectivore
Eumops_glaucinus	60.94	35.1	127.05	1.94397	0.494322	23.61	11.95	9.94	10.25	6.956	8.82	16.93	17.02	4.88	Aerial insectivore
Gardnerycteris_crenulatum	49.0378	13.6556	85.6444	1.48306	0.479395	22.1311	8.71889	8.28889	8.99333	5.48994	6.98389	13.0544	13.9144	5.09556	Foliage gleaner
Glossophaga_soricina	35.1658	9.7308	61.9462	1.4432	0.378219	21.0814	8.6144	7.2286	5.5726	1.10393	6.59958	13.592	12.9612	3.76564	Nectarivore
Histiotus_humboldti	45.17	9.1	95.5	1.33555	0.746668	16.2	8.15	5.66	6.16	2.3288	6.31	10.25	9.55	3.76	Aerial insectivore
Histiotus_montanus	47.65	11.6	111.05	1.34442	0.671209	17.54	8.6	6.09	6.75	2.5771	6.6175	10.68	10.09	3.68	Aerial insectivore
Hsunycteris_cadenai	31.62	8	61.05	1.52614	0.484704	21.695	8.775	7.06	5.365	1.0724	6.5425	14.55	13.475	4.105	Nectarivore
Hsunycteris_pattoni	31.685	6.925	64.6	1.58569	0.495259	21.62	8.805	7.05	5.445	1.1401	6.6025	14.195	13.32	4.05	Nectarivore
Hsunycteris_thomasi	31.6757	8.42857	63.1	1.48364	0.425606	20.5264	8.71286	6.87643	5.37429	1.43341	6.4375	13.9436	13.145	3.78	Nectarivore
Lichonycteris_obscura	30.8063	6.03269	60.85	1.56247	0.329686	18.1479	7.99327	5.73394	4.2476	0.682063	5.86726	11.9465	11.3117	3.35288	Nectarivore
Lonchophylla_chocoana	44.3233	15.1	75.05	1.51268	0.433118	27.3233	10.43	10.31	6.99667	2.2253	7.715	19.02	17.7033	4.93333	Nectarivore
Lonchophylla_concava	34.85	8.53333	68.9167	1.4832	0.455976	23.77	9.01333	8.37	5.51667	1.13372	6.81	16.7133	15.4417	3.57667	Nectarivore
Lonchophylla_fornitaca	34.3425	46.55	65.075	1.43402	0.388021	24.3525	9.23	8.3825	5.8775	1.1421	6.94875	16.8825	15.6775	3.7625	Nectarivore
Lonchophylla_robusta	43.3448	15.8029	79.3857	1.47806	0.409398	26.1038	10.3267	9.4269	6.765	2.01453	7.63357	17.7214	16.7243	5.05381	Nectarivore
Lonchophylla_thomasi	30.01	7.1	61.05	1.47779	0.686471	20.37	8.37	6.61	5.19	0.8262	6.29	13.72	12.7	3.92	Nectarivore
Lophostoma_brasiliense	35.805	11.025	63.525	1.15369	0.655246	19.48	8.205	6.92	6.41	2.3275	5.6825	11.745	11.91	5.17	Foliage gleaner
Lophostoma_silvicolum	52	24.8	98.25	1.19031	0.59605	27.04	10.9275	9.8925	8.885	5.25575	7.44625	16.785	16.7875	7.2925	Foliage gleaner
Mesophylla_macconnelli	31.3592	8.28	49.6825	1.43082	0.465451	18.1631	8.108	6.28238	7.36013	2.4198	6.59312	10.7677	10.3969	3.51562	Nomadic frugivore
Micronycteris_megalotis	32.42	5.97625	59.2938	1.28778	0.674883	18	7.5825	6.9975	5.92625	2.40986	5.69813	11.5575	11.3413	4.085	Foliage gleaner
Molossus_pretiosus	43.885	24.85	105.05	1.89146	0.445416	20.175	10.37	7.125	8.915	4.3568	7.7825	13.205	13.18	5.05	Aerial insectivore
Myotis_albescens	35.97	6.1	93.05	1.28366	0.491437	13.48	6.8	5.59	6.01	1.7176	5.33	9.83	8.39	3.57	Aerial insectivore
Myotis_keaysi	42.05	6.95833	85.0017	1.37525	0.384124	14.1142	6.89708	5.65667	5.90667	1.57282	5.28583	10.1425	9.08417	3.27	Aerial insectivore
Myotis_nigricans	35.0156	5.28	79.88	1.323	0.433773	13.5948	6.6464	5.322	5.6788	1.51564	5.1746	9.5752	8.736	3.0684	Aerial insectivore
Myotis_riparius	37.9581	5.58125	72.5263	1.31609	0.415068	13.9731	6.77438	5.44625	5.75312	1.62047	6.07344	9.93812	8.79937	3.39562	Aerial insectivore
Noctilio_leporinus	80.63	48.25	121.5	1.70477	0.318582	25.695	13.535	10.3925	12.73	9.28275	10.1962	17.535	17.5825	6.0775	Piscivore
Peropteryx_kappleri	50.14	9.7	69.975	1.43416	0.359245	16.54	7.955	6.93	8.025	3.26	5.825	12.345	11.535	3.3	Aerial insectivore
Phyllostomus_discolor	63.4572	35.42	98	1.42404	0.386824	30.9448	12.2936	10.118	10.6252	4.57458	9.85969	19.594	18.91	7.2852	Gleaning carnivoro
Phyllostomus_hastatus	89.5342	103.671	136.221	1.51423	0.399442	38.5887	14.7988	14.1596	13.9417	10.5193	11.8248	25.4879	24.87	10.9071	Gleaning carnivoro
Phyllostomus_latifolius	60.075	31.525	94.725	1.27019	0.38378	27.915	11.11	10.72	10.875	7.4887	8.83625	18.135	17.4775	6.52	Gleaning carnivoro
Platyrrhinus_brachycephalus	37.96	14.1	52.05	1.54497	0.503583	22.19	9.3	7.98	8.97	3.0107	7.835	14.03	14.13	4.59	Nomadic frugivore
Platyrrhinus_chocoensis	49.3276	33.9576	74.4828	1.48018	0.379829	27.7629	11.8821	10.7224	11.6509	6.26178	9.65233	18.8831	18.8664	7.12034	Nomadic frugivore
Platyrrhinus_dorsalis	46.6954	26.9224	73.6847	1.509	0.379697	26.5026	11.1886	10.4632	11.7296	6.11745	9.23182	18.2556	18.2726	6.222	Nomadic frugivore
Platyrrhinus_helleri	38.5788	14.2877	60.4193	1.51052	0.425134	22.06	9.35474	7.93842	9.03719	3.40811	7.71412	14.2077	14.2786	5.31298	Nomadic frugivore
Platyrrhinus_ismaeli	48.1929	27.5804	73.1179	1.5138	0.427687	27.7979	11.6893	11.2564	12.4207	6.91999	9.61375	19.44	19.2832	6.65786	Nomadic frugivore
Platyrrhinus_nigellus	44.9292	23.35	70.525	1.50099	0.572094	25.915	10.8483	10.0258	11.2875	5.95229	8.89375	17.5133	17.5408	5.88083	Nomadic frugivore
Platyrrhinus_nitelinea	54.9975	42.875	88.1	1.60807	0.50155	30.6725	12.6125	12.55	14.0025	9.26742	10.5625	21.7725	21.625	7.6475	Nomadic frugivore
Platyrrhinus_vittatus	59.877	53.8259	90.1556	1.54052	0.422639	32.9407	13.4119	13.5811	15.2433	11.9645	11.3554	23.2819	23.213	8.88593	Nomadic frugivore
Platyrrihinus_albericoi	59.855	56.125	98.1	1.56834	0.497456	33.39	13.635	13.955	15.63	12.3036	17.515	23.46	23.335	9	Nomadic frugivore
Rhinophylla_alethina	35.6833	12.96	58.1689	1.45226	0.394439	19.4176	8.90667	4.91156	6.84911	0.523432	7.40356	12.2236	11.8067	4.40689	Sedentary frugivore
Rhogeessa_io	32.61	5.1	43.55	1.34642	0.513063	13.69	6.3	4.93	6.27	1.8445	5.41	19.38	8.56	4.06	Aerial insectivore
Rhynconycteris_naso	35.41	3.025	46.025	1.43519	0.284826	12.155	6.1	4.275	6.045	1.126	4.565	7.555	7.04	1.865	Aerial insectivore
Saccopteryx_leptura	39.6753	4.57895	60.8368	1.48313	0.332376	14.6647	6.61895	5.90158	6.55684	2.23369	5.09421	11.0711	9.80147	3.21842	Aerial insectivore
Sturnira_aratathomasi	57.6833	51.9067	97.64	1.49581	0.339572	27.43	12.9173	7.97733	9.885	2.61474	10.7088	16.6433	17.2313	7.146	Sedentary frugivore
Sturnira_bakeri	42.94	24.0875	72.5375	1.46117	0.433988	22.5712	10.73	6.88875	8.165	1.89421	8.61125	14.3012	14.3	5.51625	Sedentary frugivore
Sturnira_bidens	42.2754	19.327	61.9998	1.5051	0.348474	55.43	9.99683	6.35095	7.05667	1.52281	7.85484	12.8114	12.8029	4.90349	Sedentary frugivore
Sturnira_bogotensis	42.2977	17.9979	58.2292	1.46057	0.374012	21.4604	10.186	6.30175	7.92375	1.5728	8.34258	13.3837	13.2898	5.40587	Sedentary frugivore
Sturnira_erythromos	40.5426	15.6592	59.0654	1.446	0.354782	20.763	9.80367	6.11551	7.54429	1.4749	7.91131	12.8778	12.6549	4.90163	Sedentary frugivore
Sturnira_koopmanhilli	49.538	29.44	67.545	1.5362	0.454721	25.183	11.332	7.223	8.153	1.68493	9.193	15.781	15.761	6.025	Sedentary frugivore
Sturnira_lilium	40.7797	18.0591	57.5606	1.44756	0.412459	21.4285	10.1661	6.45212	7.75091	1.60363	7.9353	13.2782	13.1727	5.15364	Sedentary frugivore
Sturnira_ludovici	46.4327	27.0187	72.3982	1.44318	0.366292	23.8574	10.8689	6.87772	8.33861	1.93709	8.90251	14.6883	14.767	5.80196	Sedentary frugivore
Sturnira_luisi	42.7735	21.83	66.36	1.46156	0.425825	22.9675	10.6985	7.006	8.252	1.75627	8.6045	14.5995	14.562	5.614	Sedentary frugivore
Sturnira_mordax	50.3987	33.67	79.7094	1.44614	0.404165	25.1656	11.3781	7.23937	8.0125	1.74663	9.07375	15.9537	15.965	6.0475	Sedentary frugivore
Sturnira_oporaphilum	45.8175	23.5	62.5125	1.48328	0.340734	24.195	11.145	6.9425	8.4125	1.92053	9.08375	14.96	14.995	5.955	Sedentary frugivore
Thyroptera_tricolor	36.0775	4.5625	72.9375	1.36096	0.341089	14.7225	7.4025	5.955	5.3325	1.5392	4.81125	10.3075	9.535	2.2025	Aerial insectivore
Tonatia_saurophila	58.735	31.325	96.0625	1.36143	0.571216	29.2925	11.25	10.335	9.1375	5.53845	9.025	18.4025	18.2875	7.85	Foliage gleaner
Trachops_cirrhosus	58.35	29.1	88.05	1.32318	0.588946	27.09	11.19	9.8	10.08	6.552	8.49	17.87	17.25	5.5	Gleaning carnivoro
Trinycteris_nicefori	36.2204	9.536	56.72	1.37596	0.402615	20.6052	8.4992	7.5536	6.9948	1.87706	6.3848	13.186	12.9092	4.0324	Foliage gleaner
Uroderma_bilobatum	41.6483	15.4167	56.5417	1.41262	0.42608	22.1867	9.39417	7.8825	9.1375	3.8993	7.67583	13.8775	13.8542	5.05667	Nomadic frugivore
Uroderma_convexum	41.08	14.2375	55.525	1.46888	0.435238	21.9638	9.345	7.69625	8.8475	3.61869	7.73937	13.7225	13.6713	4.9005	Nomadic frugivore
Vampyressa_pusilla	32.58	8.3	46.3062	1.46231	0.486575	18.525	8.36	5.9875	7.825	2.4979	6.89	10.9987	10.9962	3.985	Nomadic frugivore
Vampyressa_thyone	30.4881	8.16222	48.9722	1.46723	0.444386	18.0124	8.24315	5.88148	7.7787	2.493	6.70232	10.6107	10.6739	3.88685	Nomadic frugivore
Vampyriscus_nymphaea	36.534	13.1302	57.2721	1.46706	0.452539	20.7151	9.28116	7.0886	8.80581	3.4658	7.37965	13.0749	13.0777	4.38535	Nomadic frugivore
Vampyrodes_caraccioli	53.6467	33.4583	82.3583	1.49719	0.398993	27.5183	11.5925	10.255	12.5575	9.29573	9.775	18.005	17.8042	7.9625	Nomadic frugivore
